# Supplementary material
Source: publisher figshare collection journal article supplement (https://acs.figshare.com/ndownloader/files/5938215)
Supplement: Supplementary file 1 [file 5938215]

## **Supplementary Information**

### **Role of remote interfacial phonon (RIP) scattering in heat transport across graphene/SiO<sub>2</sub> interfaces**

Yee Kan Koh<sup>1</sup>, Austin S. Lyons<sup>2</sup>, Myung-Ho Bae,<sup>2,3</sup> Bin Huang,<sup>1</sup> Vincent E. Dorgan,<sup>2</sup>  
David G. Cahill<sup>4</sup>, and Eric Pop<sup>2,5</sup>

<sup>1</sup>*Department of Mechanical Engineering, and Centre for Advanced 2D Materials, National University of Singapore, Singapore*

<sup>2</sup>*Department of Electrical & Computer Engineering, Micro and Nanotechnology Lab, University of Illinois, Urbana, Illinois 61801, USA*

<sup>3</sup>*Korea Research Institute of Standards and Science, Daejeon 34113, Republic of Korea*

<sup>4</sup>*Department of Materials Science and Engineering, and Frederick Seitz Materials Research Laboratory, University of Illinois, Urbana, Illinois 61801, USA*

<sup>5</sup>*Department of Electrical Engineering and Precourt Institute for Energy, Stanford University, Stanford, CA 94305, USA*

#### **S1. Fabrication process**

Dual-gated graphene field-effect transistors were prepared by nano-fabrication processes as shown in Supplementary Fig. 1.

- (a) Graphene flakes were mechanically exfoliated on a SiO<sub>2</sub>/Si substrate and a graphene flake is located by an optical microscope.
- (b) A PMMA (Polymethyl methacrylate) layer was coated on the substrate at 6000 rpm and baked at 200 °C for 2 minutes. Two regions of the selected graphene were exposed to the air after e-beam lithography and development processes.

- (c) Ti (10 nm) and Au (40 nm) were successively deposited by a thermal e-beam evaporation.
- (d) A lift-off process with acetone left a graphene with source and drain electrodes.
- (e) With the same recipe of (b) for the PMMA coating and e-beam lithography process, a region between the source and drain was developed.
- (f) SiO<sub>2</sub> (~24 nm) was thermally evaporated by an e-beam evaporator at  $\sim 8 \times 10^{-7}$  Torr.
- (g) After transferring the substrate to another e-beam evaporator, a Al (90 nm) were deposited.
- (h) After a lift-off process in acetone, a top-gated graphene field-effect transistor was completed.

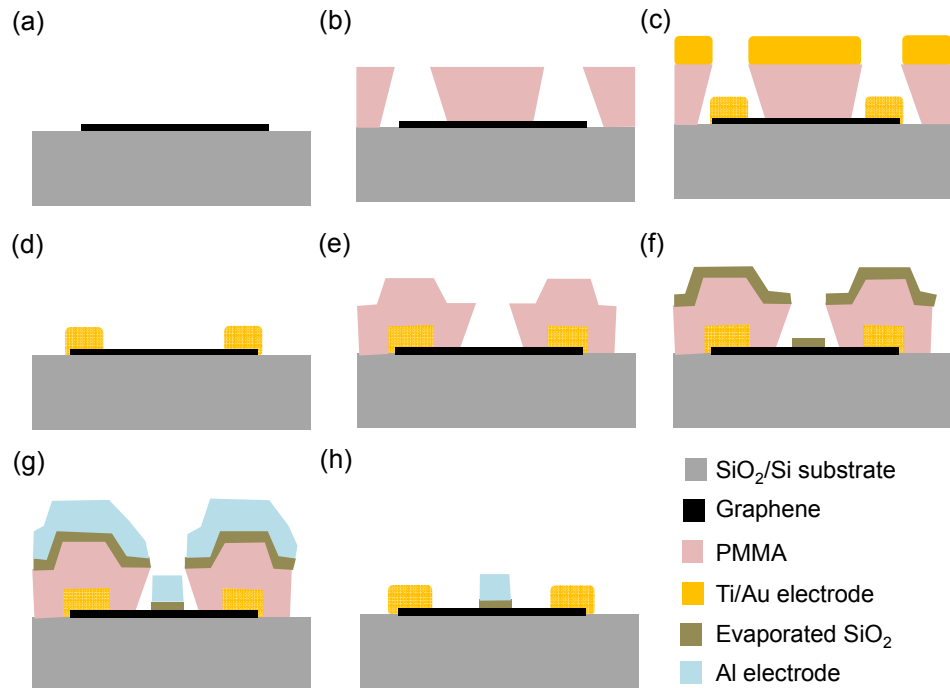

**Supplementary Fig. S1** Schematic of fabrication process of a graphene dual-gated field-effect transistor.

## S2. Sample images and Raman spectra

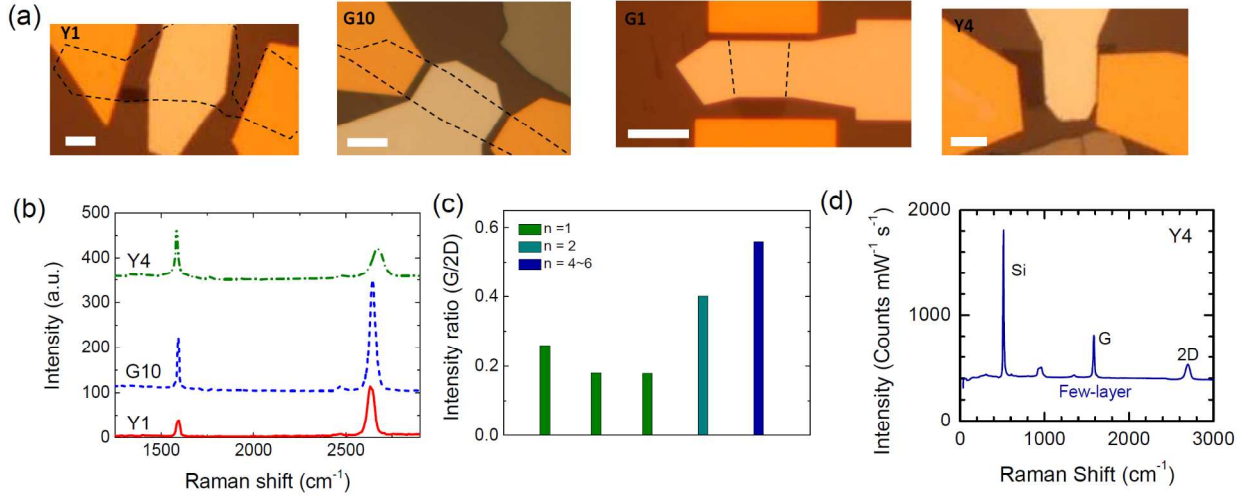

**Supplementary Fig. S2** (a) Optical microscope images of samples, Y1, G10, G1 and Y4. Scale bar are 10  $\mu\text{m}$ . (b) Raman spectra of Y1, G10 and Y4. (c) Intensity ratio of G and 2D peak (G/2D) of G4, Y1, G10, G1 and Y4. In Ref. [S1], it has been shown that the G/2D intensity ratio gives the number of graphene layer ( $n$ ): 0.2~0.3, 0.35~0.41, 0.45~0.55, 0.53~0.71 and 0.6~0.8 for  $n = 1, 2, 3, 4$  and 6, respectively. Following this report, we assigned  $n$  as shown in the figure. (d) Raman spectrum of Y4. For the sample Y4, the intensity ratio of G and Si peaks, 0.49 was additionally considered and we confirmed  $n = 6$  for Y4 [2].

### S3. Electrical characterization

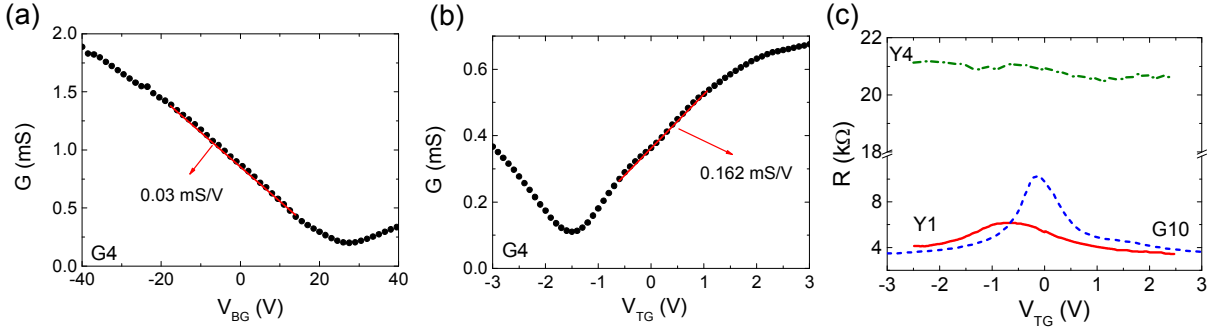

**Supplementary Fig. S3** Electrical conductance as a function of (a) back-gate voltage ( $G$ - $V_{BG}$ ) and (b) top-gate voltage ( $G$ - $V_{TG}$ ) of G4. Here  $G$ - $V_{BG}$  was obtained before defining the top gate. We estimated a low-field mobility from the transfer curve based on a relation of  $\mu = \frac{L}{w} \frac{1}{C_{ox}} \frac{dG}{dV_G}$ , where  $C_{ox}$  is the gate capacitance per unit area and  $V_G$  is the gate voltage. The back-gate channel length is  $L_{BG} = 33.7 \mu\text{m}$ , top-gate channel length,  $L_{TG} = 25 \mu\text{m}$  and channel width,  $W = 14 \mu\text{m}$ . With slopes of linear regions in the transfer curves of (a) and (b), indicated by red solid lines, we get mobility of  $\mu_{BG} = 1820 \text{ cm}^2\text{V}^{-1}\text{S}^{-1}$  and  $\mu_{TG} = 1950 \text{ cm}^2\text{V}^{-1}\text{S}^{-1}$ , respectively. Here, we used the dielectric constant for both of back- and top-gate  $\text{SiO}_2$  layers as 3.9. Since the both mobility for the back- and top-gate effect is the similar value with the same dielectric constant, we confirmed that the thermally evaporated 24 nm thick top- $\text{SiO}_2$  shows the dielectric constant as  $\sim 3.9$  as a usual value. (c) Resistance vs. top-gate voltage ( $R$ - $V_{TG}$ ) curves for Y1, G10 and Y4.

## S4. Sensitivity plots

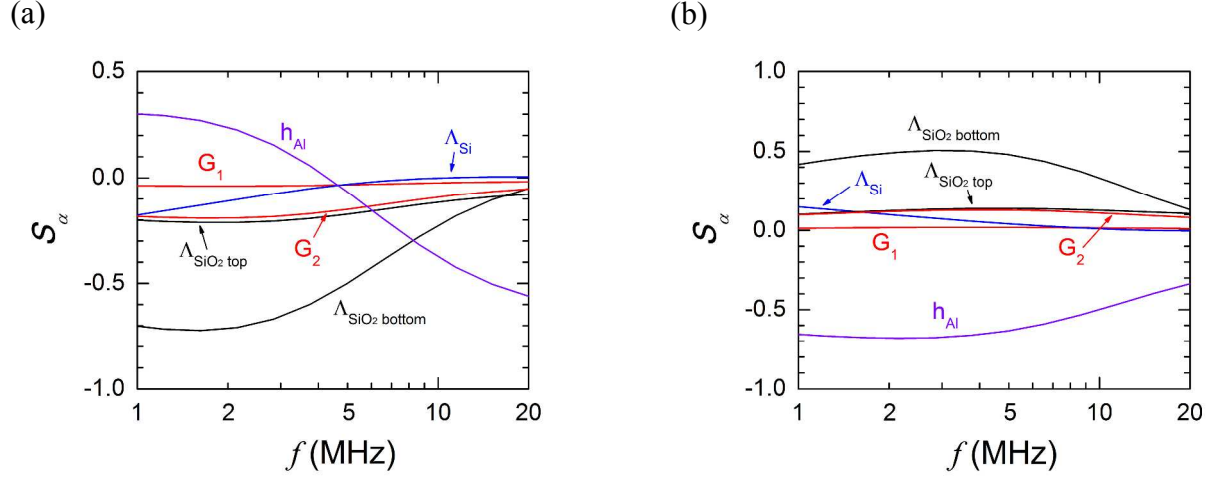

**Supplementary Fig. S4** (a) Sensitivity of  $V_{out}$  signals and (b)  $V_{in}/V_{out}$  signals to various parameters used in the thermal model, as a function of modulation frequency  $f$ . We used the structure of sample G1 for the calculation, which is a multilayered structure consisting of 84 nm Al / 25 nm  $SiO_2$  / exfoliated graphene / 90 nm  $SiO_2$  / Si substrate. The parameters are thermal conductance of Al/ $SiO_2$  interface  $G_1$ , thermal conductance of  $SiO_2$ /G/ $SiO_2$  interface  $G_2$ , thermal conductivity of Si substrate  $\Lambda_{Si}$ , thermal conductivity of top  $SiO_2$  layer  $\Lambda_{SiO_2 top}$ , thermal conductivity of bottom  $SiO_2$  layer  $\Lambda_{SiO_2 bottom}$  and thickness of Al  $\Lambda_{Al}$ . We fix the delay time at -40 ps and 100 ps for (a) and (b) respectively and assume a laser spot  $1/e^2$  radii of 4  $\mu m$ . As illustrated in the figures, we choose to use  $V_{out}$  and  $f \approx 10$  MHz in our VMTR measurements, to achieve the highest sensitivity to  $G_2$  and lowest sensitivity to other parameters.

## S5. Comparison of raw data of TDTR and VMTR

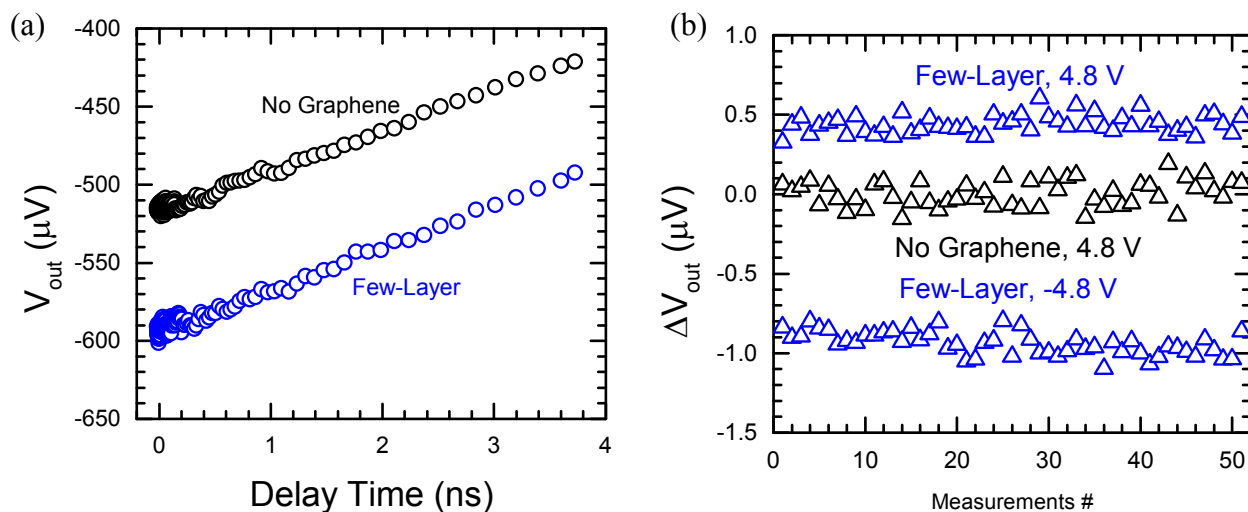

**Supplementary Fig. S5** (a) Out-of-phase components of TDTR measurements ( $V_{\text{out}}$ ) on the few-layer graphene sample and a region without graphene on a sample, as labeled. In these measurements, we used a modulation frequency of 10 MHz, a total laser power of  $\sim 62$  mW and laser spot sizes of  $\sim 4$   $\mu\text{m}$ . The noise, usually on the order of 2% of the signals ( $\sim 10$   $\mu\text{V}$ ), originates from the noise in laser intensity, the variation of phase in the rf lock-in amplifier, etc. From measurements to measurements, the precision of TDTR measurements is on the order of 1% ( $\sim 5$   $\mu\text{V}$ ), usually limited by phase drift in the rf lock-in amplifier. (b) VMTR measurements on the same sample as in (a), using the same laser power and laser spot size as in (a). The "on"-state gate voltages that we applied are as labeled. By averaging 40-100 VMTR measurements as in the figure, we are able to reduce the uncertainty of VMTR measurements to  $\sim 0.012$   $\mu\text{V}$ , more than 100 times better than the uncertainty of TDTR measurements.

### References for Supplementary information

- [1] D. Graf et al., Nano Letters **7**, 238 (2007)
- [2] Y.K. Koh, M.-H. Bae, D.G. Cahill, E. Pop, ACS Nano **5**, 269 (2011).
